# Supplementary material for: Tissue-specific expression of senescence biomarkers in spontaneously hypertensive rats: evidence of premature aging in hypertension
Source: PeerJ. 2023 Oct 19;11:e16300. doi: 10.7717/peerj.16300 (PMC10590574; doi:10.7717/peerj.16300)
Supplement: Supplemental Information 5 [file peerj-11-16300-s005.xlsx]

## Sheet:  Figure 2 (A-D)
Figure 2. Blood pressure profiles, (A) systolic blood pressure (SBP), (B) diastolic blood pressure (DBP), (C) mean arterial blood pressure (MAP), and (D) serum Timp-1 of spontaneously hypertensive (SHR) and wild-type (WT) rats at the age of 6, 12, 24 and 36 weeks.
Fig 2A. Systolic blood pressure (mmHg)
	Systolic blood pressure (mmHg)
N	6WT	6SHR	12WT	12SHR	24WT	24SHR	36WT	36SHR
1	109	124.5	124.7	187.5	148.6	170.7	158.2	164.3
2	111.8	108.9	140.6	197.5	145.3	172.1	156.4	169.7
3	136.9	162.3	142.2	163.9	105.2	159.9	146	192.1
4	121.8	154.5	137.7	180.9	133.5	163.1	139.2	189.4
5	131.2	129.7	129.8	179.8	97.4	183	130.7	163.6
6	105.8	118.8	110.8	158.8	132.2	184.5	114.2	167.3
7	121.7	135.5	139.2	173	145.9	183.6	111.9	151.3
8	123.9	147.1	127	169.7	150.2	192.7	92.7	161.5
9	116.1	166.2	140.7	179.1	145.9	206.8	139	158.1
10	114.3	188.3	140.7	166.7	139.6	174.6	134.1	172.4
Mean	119.25	143.58	133.34	175.69	134.38	179.1	132.24	168.97
SEM	3.1	7.77	3.21	3.68	5.86	4.45	6.54	4.09
Fig 2B. Diastolic blood pressure(mmHg)
	Diastolic blood pressure(mmHg)
N	6WT	6SHR	12WT	12SHR	24WT	24SHR	36WT	36SHR
1	83.8	94	87	136.5	108.6	129.1	113.3	123.2
2	79.4	67.6	94.4	145.1	109.8	124.7	112	125.6
3	99.2	127.3	99.8	119.2	73.1	116.8	101.4	150.9
4	91.7	114.3	97.7	133.3	85.5	116.3	97.8	142.9
5	91.7	95.1	91.1	129.6	65.7	134.1	97.1	123.5
6	70.6	78.8	73.8	119.2	95.3	134.2	82.3	125.6
7	90.8	103.6	94.4	119.7	108	133.2	80.7	114.3
8	93.6	111	91.8	125.2	110.2	145.2	62.1	116.4
9	80.4	121.5	99.9	133.4	103.6	158.3	103.1	118.7
10	84.7	151.6	99.9	116.5	109.6	131.9	98.6	122.3
Mean	86.59	106.48	92.98	127.77	96.94	132.38	94.84	126.34
SEM	2.66	7.71	2.53	2.96	5.25	3.96	4.95	3.67
Fig 2C. Mean arterial blood pressure (mmHg)
	Mean arterial blood pressure (mmHg)
N	6WT	6SHR	12WT	12SHR	24WT	24SHR	36WT	36SHR
1	91.6	104.1	100	152.2	122	143.6	129.1	137.1
2	90.1	81.4	109.8	162.8	121.6	140.6	126.7	140.4
3	111.7	139	114	134.1	83.6	130.7	116.6	164.6
4	101.9	128.9	111	149.2	101.3	132.2	111.8	158.4
5	104.8	107.5	103.3	146.2	76.2	137.5	108.4	136.7
6	82.5	92.6	86.2	132.2	108.3	151.1	92.7	139.5
7	101.1	114.4	109.3	137.5	120.7	149.9	91.2	126.5
8	103.8	122.9	103.7	139.8	123.4	161.1	72.1	132.4
9	92.1	136.4	111.6	148.6	117.5	175.1	115.2	131.4
10	92.6	163.7	111.6	133.3	120.1	146.4	115.7	140.1
Mean	97.22	119.09	106.05	143.59	109.47	146.82	107.95	140.71
SEM	2.78	7.67	2.62	3.13	5.42	4.27	5.58	3.76
Fig 2D. Serum Timp1 level (ng/ml)
	Serum Timp1 level (ng/ml)
N	6WT	6SHR	12WT	12SHR	24WT	24SHR	36WT	36SHR
1	15.236	11.836	10.324	9.413	8.102	9.502	13.369	9.058
2	13.791	10.902	11.924	10.213	8.058	8.302	9.458	8.769
3	13.191	10.969	9.391	8.28	5.147	9.08	8.613	13.302
4	15.347	9.458	10.858	9.524	3.991	8.124	9.658	11.658
5	8.458	9.991	9.524	9.924	11.48	9.258	9.08	12.569
6	11.036	12.347	9.28	9.302	9.213	8.147	9.747	12.347
7	10.947	9.636	10.058	9.969	9.569	8.547	12.391	11.924
Mean	12.572	10.734	10.194	9.518	7.937	8.709	10.331	11.375
SEM	0.9586	0.4165	0.3585	0.2411	0.9788	0.2137	0.6822	0.6659

## Sheet: Figure 3 (A-B)
Fig 3A Plasma O-methylated metabolites of the catecholamines (ng/L)
N	Plasma O-methylated metabolites of the catecholamines (ng/L)
	Metanephrine (METS)		Noremetanephrine (NMNX		3-Methoxytyramine (3-MT)
	WT	SHR	WT	SHR	WT	SHR
1	69.1	71.1	225.9	205.9	51.5	41.9
2	84.5	71.8	248.2	152	37	25
3	72	81.3	208.6	158.5	13.6	42.8
4	47.5	64.4	158	127.8	38.1	37.4
5		88.2		199.6		43.6
Mean	68.28	75.36	210.2	168.8	35.05	38.14
SEM	7.689	4.19	19.19	14.82	7.873	3.456
Fig 3B. Serum Timp1 level (ng/ml)
	Serum Timp1 level (ng/ml)
N	6WT	6SHR	12WT	12SHR	24WT	24SHR
1	15.236	11.836	10.324	9.413	8.102	9.502
2	13.791	10.902	11.924	10.213	8.058	8.302
3	13.191	10.969	9.391	8.28	5.147	9.08
4	15.347	9.458	10.858	9.524	3.991	8.124
5	8.458	9.991	9.524	9.924	11.48	9.258
6	11.036	12.347	9.28	9.302	9.213	8.147
7	10.947	9.636	10.058	9.969	9.569	8.547
Mean	12.572	10.734	10.194	9.518	7.937	8.709
SEM	0.9586	0.4165	0.3585	0.2411	0.9788	0.2137

## Sheet: Figure 4(A-H)
Figure 3. mRNA expression of inhibitors of cyclin-dependent kinases (CDKIs); Cdkn2a (A–D) and Cdkn1a (E–H) in the heart, liver, bone, kidney, and hypothalamus of SHR and WT rats at the age of 6, 12, 24 and 36 weeks.
Fig 3A. Cdkn2a mRNA expression (fold change) at the age of 6 weeks
	Cdkn2a mRNA expression (fold change)
	Heart		Liver		Bone		Kidney		Hypothalamus
N	6WT	6SHR	6WT	6SHR	6WT	6SHR	6WT	6SHR	6WT	6SHR
1	0.224	374.535	0.1751	-	0	0	0	0	0.1944	0.1163
2	1.1701	111.698	0.4116	8.0394	0	0	0	0	0.6892	0.3407
3	0.3093	290.084	0.3329	29.8217	0	0	0	0	0.612	0.5205
4	0.0632	37.5299	1.0062	15.4096	0	0	0	0	0.5756	0.4769
5	3.1814	4.5591	-	40.9058	0	0	0	0	1.0665	0.5596
6	0.5508	197.991	1.6546	13.3527	0	0	0	0	0.8433	-
7	0.4729	129.517	4.068	28.1873	0	0	0	0	1.6512	0.3972
8	-	112.544	-	8.6235	0	0	0	0	1.2816	0.5995
9	1.842	17.9993	0.1092	48.4956	0	0	0	0	2.0181	1.2726
10	1.1862	382.37	0.2426	15.4814	0	0	0	0	1.068	0.7514
Mean	1	165.883	1	23.1463	0	0	0	0	1	0.5594
SEM	0.3327	44.51	0.4758	4.833	0	0	0	0	0.1716	0.1071
Fig 3B. Cdkn2a mRNA expression (fold change) at the age of 12 weeks
	Cdkn2a mRNA expression (fold change)
	Heart		Liver		Bone		Kidney		Hypothalamus
N	12WT	12SHR	12WT	12SHR	12WT	12SHR	12WT	12SHR	12WT	12SHR
1	-	32.3172	3.109	92.0147	0	0	0	0	0.7964	0.5956
2	0.8037	-	0.4263	76.5638	0	0	0	0	0.673	0.6301
3	2.6311	4.9836	0.4127	41.5752	0	0	0	0	0.7465	-
4	1.686	99.1484	0.3154	69.1047	0	0	0	0	0.973	0.8927
5	1.2034	13.0777	0.9631	277.241	0	0	0	0	0.8597	0.5132
6	0.5165	58.4475	0.8543	17.9599	0	0	0	0	0.7691	0.8963
7	0.4557	19.1062	2.4866	26.3532	0	0	0	0	1.6155	-
8	-	29.3502	0.3868	148.501	0	0	0	0	1.1834	-
9	0.2791	36.991	0.7149	-	0	0	0	0	-	-
10	0.4245	38.3551	0.331	37.2429	0	0	0	0	1.3834	-
Mean	1	36.8641	1	87.3952	0	0	0	0	1	0.7056
SEM	0.2864	9.371	0.3114	27.24	0	0	0	0	0.1084	0.0794
Fig 3C. Cdkn2a mRNA expression (fold change) at the age of 24 weeks
	Cdkn2a mRNA expression (fold change)
	Heart		Liver		Bone		Kidney		Hypothalamus
N	24WT	24SHR	24WT	24SHR	24WT	24SHR	24WT	24SHR	24WT	24SHR
1	-	101.49	0.2232	149.137	0	0	0	0	1.1934	0.8428
2	0.558	61.7189	1.0398	469.601	0	0	0	0	0.9439	0.2654
3	1.4588	119.345	0.0799	198.68	0	0	0	0	0.2205	0.1032
4	2.0133	181.453	0.0417	286.295	0	0	0	0	0.8272	0.2239
5	0.3322	68.4885	0.0862	42.3555	0	0	0	0	1.0645	0.1614
6	-	11.5386	0.0511	154.447	0	0	0	0	-	0.5077
7	1.006	20.3095	3.6122	116.784	0	0	0	0	0.8905	-
8	0.4293	26.4641	-	114.135	0	0	0	0	0.9214	1.212
9	0.4739	34.1908	3.5458	263.416	0	0	0	0	1.4757	1.6828
10	1.7285	37.9528	0.3202	-	0	0	0	0	1.4629	1.5173
Mean	1	66.2951	1	199.428	0	0	0	0	1	0.7241
SEM	0.2319	16.96	0.4982	42.16	0	0	0	0	0.1259	0.2045
Fig 3D. Cdkn2a mRNA expression (fold change) at the age of 36 weeks
	Cdkn2a mRNA expression (fold change)
	Heart		Liver		Bone		Kidney		Hypothalamus
N	36WT	36SHR	36WT	36SHR	36WT	36SHR	36WT	36SHR	36WT	36SHR
1	1.8147	27.2886	1.4983	27.1667	0	0	0	0	1.1575	0.5025
2	1.0559	24.0709	1.1155	38.1678	0	0	0	0	1.0979	0.3822
3	-	37.8924	0.7229	13.5769	0	0	0	0	1.1505	0.2757
4	1.2494	2.7747	0.5552	17.0869	0	0	0	0	0.8153	0.6296
5	0.4042	3.8416	1.9502	31.3439	0	0	0	0	1.3825	0.5527
6	0.2189	100.958	0.2666	-	0	0	0	0	1.0855	0.7811
7	0.3947	127.557	-	42.9168	0	0	0	0	0.8029	0.9968
8	0.4157	0.8696	0.2829	108.345	0	0	0	0	1.0251	1.0918
9	0.8869	8.8613	2.2782	51.1546	0	0	0	0	0.7723	0.6157
10	2.5596	2.352	0.3301	207.775	0	0	0	0	0.7104	1.86
Mean	1	33.6466	1	59.7259	0	0	0	0	1	0.7688
SEM	0.2595	14.15	0.252	20.72	0	0	0	0	0.0683	0.1453
Fig 3E. Cdkn1a mRNA expression (fold change) at the age of 6 weeks
	Cdkn1a mRNA expression (fold change)
	Heart		Liver		Bone		Kidney		Hypothalamus
N	6WT	6SHR	6WT	6SHR	6WT	6SHR	6WT	6SHR	6WT	6SHR
1	0.7228	2489.79	0.6106	-	0.8989	0.399	-	0.4186	0.7376	0.1952
2	1.1354	2992.27	0.6518	7.1397	0.8218	0.5894	1.5605	0.1844	1.2858	0.1314
3	0.7147	4186.83	0.8403	37.4969	0.5455	0.4883	0.6858	0.1656	1.4135	0.2801
4	0.7065	168.787	2.0349	16.2242	0.8364	0.4907	1.0666	0.2202	0.7218	0.3023
5	1.0022	91.6107	0.1223	62.9526	1.1004	0.7614	0.3843	-	0.9891	0.184
6	1.1303	2330.66	0.335	15.1756	0.8635	0.5474	1.2351	0.1963	0.7459	-
7	0.5162	1642.3	2.6268	14.7899	-	0.8517	0.7163	0.346	1.0857	0.4064
8	-	2960.25	-	10.3071	1.5112	0.6661	1.6747	0.3566	1.1626	0.2408
9	1.2451	608.559	0.574	8.7378	1.0055	0.3211	-	0.1277	0.7181	0.1063
10	1.8269	3527.31	1.2044	2.8676	1.4168	0.8447	0.6768	-	1.1399	0.0728
Mean	1	2099.84	1	19.5213	1	0.596	1	0.2519	1	0.2132
SEM	0.1322	451.3	0.2752	6.339	0.1013	0.05764	0.1632	0.03759	0.08141	0.03526
Fig 3F. Cdkn1a mRNA expression (fold change) at the age of 12 weeks
	Cdkn1a mRNA expression (fold change)
	Heart		Liver		Bone		Kidney		Hypothalamus
N	12WT	12SHR	12WT	12SHR	12WT	12SHR	12WT	12SHR	12WT	12SHR
1	-	286.28	0.6113	46.0173	1.1869	0.5926	1.079	0.2421	1.5502	0.1733
2	1.0085	-	0.988	24.0965	-	0.5867	0.6328	0.1856	0.6945	0.2002
3	2.2587	590.057	1.13	17.7327	0.9927	1.1456	1.5379	0.1305	0.5642	-
4	1.4885	825.369	1.5143	29.3844	0.9846	0.7038	0.9634	0.1423	1.107	0.3095
5	0.3068	260.405	0.6334	51.361	0.9113	0.9916	0.4455	0.1319	1.5351	0.1971
6	0.8795	1416.42	1.3045	5.3056	1.2187	0.7943	0.5753	0.1725	1.0782	0.1948
7	0.4487	499.315	1.9442	11.8958	1.01	0.9671	0.7614	0.1147	0.5525	-
8	1.0128	1572.67	0.5889	56.9875	0.5644	0.9458	1.772	-	0.4417	-
9	0.708	3759.87	0.6008	-	0.9154	1.9157	1.2326	0.1973	-	-
10	0.8885	2467.03	0.6844	27.0304	1.216	0.6474	-	0.2642	1.4766	-
Mean	1	1297.49	1	29.979	1	0.9291	1	0.1757	1	0.215
SEM	0.1944	390.5	0.1483	5.978	0.06817	0.1249	0.1503	0.01733	0.1504	0.0241
Fig 3G. Cdkn1a mRNA expression (fold change) at the age of 24 weeks
	Cdkn1a mRNA expression (fold change)
	Heart		Liver		Bone		Kidney		Hypothalamus
N	24WT	24SHR	24WT	24SHR	24WT	24SHR	24WT	24SHR	24WT	24SHR
1	1.746	1288.04	0.354	8.3142	0.3901	0.5546	2.9473	0.5439	0.67	0.1059
2	0.7857	907.215	1.7897	23.9948	1.0114	-	0.5845	-	0.1627	0.217
3	0.4737	701.372	0.7052	25.6544	2.012	-	0.221	0.3368	1.0121	0.0134
4	0.6981	1804.96	0.4943	19.3698	1.4837	-	0.8691	0.2812	1.958	0.0655
5	0.738	242.771	0.7593	1.1346	1.1576	1.8948	0.206	0.0574	1.5697	0.0674
6	-	41.4926	0.9693	11.4555	0.5135	1.3548	0.1441	0.1185	-	0.0594
7	0.7152	176.081	0.9296	14.8503	0.8688	0.5621	0.3023	0.0548	0.5034	-
8	1.132	189.337	0.3228	10.1169	0.9412	0.8879	0.7601	0.2133	0.9725	0.0391
9	0.5238	45.5287	0.7203	18.3287	0.6031	1.3581	1.6895	0.0866	0.4178	0.081
10	2.1875	370.803	2.9555	-	1.0187	0.8892	2.2761	0.0966	1.7339	0.1012
Mean	1	576.76	1	14.8021	1	1.0716	1	0.1988	1	0.0833
SEM	0.1963	187.7	0.254	2.629	0.1517	0.1848	0.3091	0.0547	0.2101	0.0193
Fig 3H. Cdkn1a mRNA expression (fold change) at the age of 36 weeks
	Cdkn1a mRNA expression (fold change)
	Heart		Liver		Bone		Kidney		Hypothalamus
N	36WT	36SHR	36WT	36SHR	36WT	36SHR	36WT	36SHR	36WT	36SHR
1	0.4244	87.2823	2.2764	32.1126	0.514	-	1.7659	-	1.2578	0.3894
2	1.7997	44.8922	2.1655	14.9134	0.7646	0.5593	1.8536	0.1478	0.3049	0.2517
3	-	292.09	1.2804	1.7392	0.5754	1.3598	1.3643	0.1034	0.715	0.1456
4	1.6479	26.9812	0.9247	1.7202	1.333	0.9063	0.868	0.1326	0.8239	0.0787
5	-	25.1254	0.4225	2.1756	1.4201	1.8055	0.8877	0.1345	1.5249	0.0528
6	0.128	360.872	0.8253	-	1.4587	0.9405	0.8962	0.3662	1.875	0.1045
7	-	130.573	1.0909	4.7805	0.9565	0.7867	0.4542	0.3164	1.4022	0.1474
8	-	78.2957	0.44	2.8944	1.1549	1.3676	0.6866	0.2733	1.5321	0.1074
9	-	939.205	0.1586	4.228	0.8597	2.1384	0.8969	0.0952	0.1426	0.0609
10	-	83.278	0.4156	4.407	0.9629	1.3073	0.3267	0.3676	0.4217	0.2059
Mean	1	206.859	1	7.6634	1	1.2413	1	0.2152	1	0.1544
SEM	0.4234	88.87	0.2311	3.342	0.1063	0.168	0.1616	0.0381	0.1891	0.0328

## Sheet: Figure 5 (A-H)
Figure 4. mRNA expression of the senescence-associated secretory phenotypes (SASPs); Timp1 (A–D), and Mmp12 (E–H) in the heart, liver, bone, kidney, and hypothalamus of SHR and WT rats at the age of 6, 12, 24 and 36 weeks.
Fig 4A. Timp1 mRNA expression (fold change) at the age of 6 weeks
	Timp1mRNA expression (fold change)
	Heart		Liver		Bone		Kidney		Hypothalamus
N	6WT	6SHR	6WT	6SHR	6WT	6SHR	6WT	6SHR	6WT	6SHR
1	1.0816	11579.5	0.437	-	1.0862	-	-	0.4523	1.2009	0.5839
2	1.2645	7534.88	0.2367	3.0713	0.8888	0.7907	1.2123	0.593	0.668	0.9977
3	0.3163	5760.39	0.7549	16.566	0.7137	1.0273	0.7954	0.6533	0.5589	0.7702
4	1.394	820.525	1.0613	7.9898	0.6959	0.7248	1.1096	0.4625	0.8997	0.3961
5	1.3039	635.037	2.6591	39.9283	1.2115	0.8797	0.6191	-	1.1181	0.7887
6	0.9386	4442.04	0.4509	4.7529	0.649	0.6479	1.3471	0.3929	1.1593	-
7	0.4206	2158.27	2.3406	6.7429	-	0.8608	0.9851	0.6132	1.1926	0.8106
8	-	3572.62	-	5.0213	1.2596	0.833	1.4084	0.4818	0.7978	0.8709
9	1.2592	1703.54	0.2251	18.2571	1.1288	0.4626	-	0.7009	1.3171	0.74
10	1.0213	8007.58	0.8345	8.5968	1.3663	0.7034	0.5229	-	1.0877	0.8747
Mean	1	4621.43	1	12.3251	1	0.77	1	0.5437	1	0.7592
SEM	0.129	1134	0.2991	3.865	0.0898	0.0536	0.1164	0.0391	0.0803	0.0588
Fig 4B. Timp1 mRNA expression (fold change) at the age of 12weeks
	Timp1mRNA expression (fold change)
	Heart		Liver		Bone		Kidney		Hypothalamus
N	12WT	12SHR	12WT	12SHR	12WT	12SHR	12WT	12SHR	12WT	12SHR
1	-	676.366	2.7407	24.8058	1.3	0.872	0.909	0.224	0.6443	0.2726
2	0.764	-	0.2393	14.2928	-	0.7911	0.228	0.2804	1.3164	1.3029
3	1.6734	913.766	0.4225	7.4803	0.9862	1.277	0.9347	0.2193	1.1663	-
4	1.2537	2556.22	0.2308	16.8703	0.9756	0.7811	0.8072	0.2785	0.8237	0.7068
5	0.6168	665.634	0.544	72.0711	0.7526	0.8538	0.5428	0.2745	1.0885	1.0863
6	0.8915	3658.18	0.7591	2.8582	1.0314	0.9514	1.6132	0.4306	0.9262	0.6598
7	0.9545	1887.89	3.6232	7.4988	1.1549	1.2512	0.7659	0.3057	1.1995	-
8	0.5601	9546.78	0.1949	28.7701	1.0608	0.6889	1.0994	-	0.8995	-
9	1.0136	8786.7	0.7882	-	0.9318	0.9636	1.1811	0.3394	-	-
10	1.2723	3407.44	0.4574	12.0464	0.8067	1.1126	1.9188	0.197	0.9357	-
Mean	1	3566.55	1	20.7438	1	0.9543	1	0.2833	1	0.8057
SEM	0.118	1122	0.3752	6.991	0.0556	0.0634	0.1554	0.0237	0.07	0.1791
Fig 4C. Timp1 mRNA expression (fold change) at the age of 24 weeks
	Timp1 mRNA expression (fold change)
	Heart		Liver		Bone		Kidney		Hypothalamus
N	24WT	24SHR	24WT	24SHR	24WT	24SHR	24WT	24SHR	24WT	24SHR
1	2.4846	5647.98	0.2249	157.859	0.5257	0.602	1.6477	0.6173	1.556	0.7241
2	1.5373	4531.16	2.6758	162.548	0.8887	-	1.0566	-	0.9215	0.5241
3	1.3508	2946.43	0.1578	127.108	0.8433	-	0.3968	0.6335	0.6454	0.3845
4	-	5120.51	0.1296	113.675	0.9127	-	1.5271	0.6154	0.6845	0.1769
5	0.7697	1479.86	0.0815	21.4605	0.8446	1.3651	0.4219	0.3179	1.2767	0.3315
6	0.1534	175.856	0.1169	59.63	1.0628	2.4647	0.218	0.2481	-	0.5552
7	0.5316	357.113	2.2936	79.2011	1.0623	1.9752	0.6306	0.2616	1.009	-
8	0.5876	588.723	0.1318	52.6262	1.5383	1.7182	0.8053	0.3228	0.69	0.4378
9	0.5171	339.714	2.0919	158.646	1.3217	2.5439	1.2888	0.2513	0.9508	1.2261
10	1.0677	740.215	2.096	-	-	1.5304	2.0073	0.2603	1.2663	0.6247
Mean	1	2192.76	1	103.639	1	1.7428	1	0.392	1	0.5539
SEM	0.2361	688.1	0.3547	17.47	0.0982	0.2539	0.191	0.0582	0.1045	0.1
Fig 4D. Timp1 mRNA expression (fold change) at the age of 36 weeks
	fold change Timp1
	Heart		Liver		Bone		Kidney		Hypothalamus
N	36WT	36SHR	36WT	36SHR	36WT	36SHR	36WT	36SHR	36WT	36SHR
1	1.6844	932.594	1.0753	70.2225	0.547	-	1.8266	-	1.3334	0.8839
2	2	746.625	0.9186	60.3509	0.7989	1.2643	1.3814	0.2086	1.1627	0.4977
3	1.5883	3608.08	1.8564	73.8777	0.6372	2.0484	1.3199	0.2613	1.0083	0.3243
4	0.9649	364.023	0.5394	43.2704	1.083	1.2613	0.8202	0.389	0.5526	0.5431
5	0.5819	911.221	0.7379	23.1522	1.1584	1.5866	0.9512	0.2456	1.2174	0.7165
6	0.7431	13463	0.6693	-	1.3044	1.6795	0.7168	0.4934	0.8591	0.8023
7	0.5918	4337.97	0.6463	34.4158	0.8871	1.5155	0.6191	0.3115	0.8023	1.0392
8	0.4682	2002.69	0.29	73.4213	1.303	1.75	0.7199	0.4288	1.0164	0.929
9	0.3856	6494.71	2.6976	59.6863	1.3533	1.9154	1.0668	0.2282	1.1164	0.5912
10	0.9918	645.066	0.5692	130.726	0.9278	1.3862	0.5781	0.3705	0.9314	2.0622
Mean	1	3350.6	1	63.2359	1	1.6008	1	0.3263	1	0.8389
SEM	0.179	1290	0.2317	10.33	0.0905	0.092	0.127	0.0331	0.0717	0.1525
Fig 4E. Mmp12 mRNA expression (fold change) at the age of 6 weeks
	Mmp12 mRNA expression (fold change)
	Heart		Liver		Bone		Kidney		Hypothalamus
N	6WT	6SHR	6WT	6SHR	6WT	6SHR	6WT	6SHR	6WT	6SHR
1	0	0	0.2627	-	1.3585	2.7816	-	1.5073	2.7309	0.9481
2	0	0	0.2101	1.0233	1.9739	2.1099	1.0245	0.2892	0.478	2.2782
3	0	0	0.6346	14.4315	0.502	3.1327	0.5031	-	0.7579	-
4	0	0	-	3.2514	0.1821	0.763	1.5864	0.2502	1.171	-
5	0	0	-	3.7675	0.4065	1.4193	0.1674	-	0.904	0.7524
6	0	0	1.1595	1.2012	1.1559	0.7663	1.5135	0.2456	0.852
7	0	0	3.1335	3.8307	-	0.9755	1.6124	0.3217	0.5148	1.0781
8	0	0	-	0.5233	0.4402	0.8368	0.9404	0.145	1.1997	0.1659
9	0	0	-	8.9063	0.6779	0.6123	-	-	-	0.5372
10	0	0	0.5996	3.6282	2.3029	1.0518	0.6523	-	0.3916	1.5315
Mean	0	0	1	4.5071	1	1.4449	1	0.4598	1	1.0416
SEM	0	0	0.4487	1.491	0.2496	0.2876	0.1912	0.2109	0.2367	0.2621
Fig 4F. Mmp12 mRNA expression (fold change) at the age of 12 weeks
	Mmp12 mRNA expression (fold change)
	Heart		Liver		Bone		Kidney		Hypothalamus
N	12WT	12SHR	12WT	12SHR	12WT	12SHR	12WT	12SHR	12WT	12SHR
1	0	0	-	27.5609	2.8597	0.4863	2.3061	-	2.1128	0.2073
2	0	0	0.2146	9.099		2.9726	0.1946	0.3188	3.0725	1.748
3	0	0	0.4015	4.6664	0.592	1.628	0.7618	0.0523	0.5087	-
4	0	0	0.3299	7.9605	0.9869	-	0.6904	-	0.8427	0.8018
5	0	0	-	9.415	1.1705	2.4588	-	-	0.4946	0.1172
6	0	0	0.919	4.2423	0.8373	1.5074	1.9041	0.0541	0.3123	0.0786
7	0	0	-	6.0913	1.445	1.1014	-	0.2289	0.589	-
8	0	0	0.4087	-	0.4749	-	0.7092	-	0.4696	-
9	0	0	3.7263	-	0.3964	-	0.4338	0.2858	0.5978	-
10	0	0	-	12.9833	0.2373	-	-	0.0989	-	-
Mean	0	0	1	10.2523	1	1.6924	1	0.1731	1	0.5906
SEM	0	0	0.5542	2.669	0.2662	0.3683	0.298	0.0488	0.3149	0.3176
Fig 4G. Mmp12 mRNA expression (fold change) at the age of 24 weeks
	Mmp12 mRNA expression (fold change)
	Heart		Liver		Bone		Kidney		Hypothalamus
N	24WT	24SHR	24WT	24SHR	24WT	24SHR	24WT	24SHR	24WT	24SHR
1	0	0	0.0641	10.2283	0.294	0.9096	0.5205	0	3.8349	3.097
2	0	0	-	28.4963	0.7863	-	0.1147	0	1.2349	2.0513
3	0	0	0.1655	10.1468	1.099	-	0.3307	0	0.105	1.6565
4	0	0	0.4277	9.3924	2.661	-	2.1507	0	0.2102	-
5	0	0	0.0734	-	1.4187	1.0685	0.996	0	0.3575	0.4883
6	0	0	0.113	-	0.1846	-	0.9104	0	-	0.1695
7	0	0	-	-	0.3478	0.9156	1.2501	0	1.5908	-
8	0	0	0.0877	4.801	1.4753	2.6788	-	0	0.7523	0.4026
9	0	0	3.1712	3.6152	0.7332	-	1.5985	0	0.5416	3.1067
10	0	0	3.8976	-	-	1.6665	1.1284	0	0.3728	0.4509
Mean	0	0	1	11.1133	1	1.4478	1	0	1	1.4278
SEM	0	0	0.5588	3.665	0.2602	0.3376	0.2118	0	0.3899	0.4334
Fig 4H. Mmp12 mRNA expression (fold change) at the age of 36 weeks
	Mmp12 mRNA expression (fold change)
	Heart		Liver		Bone		Kidney		Hypothalamus
N	36WT	36SHR	36WT	36SHR	36WT	36SHR	36WT	36SHR	36WT	36SHR
1	0	0	0.7336	14.3179	0.4137	-	3.9181	0	2.4388	1.8448
2	0	0	0.3289	6.0418	0.8018	1.8335	-	0	3.4121	0.6731
3	0	0	1.1794	-	0.8888	2.4311	1.1529	0	0.8	0.4778
4	0	0	1.1338	-	1.8267	0.3898	0.4369	0	0.0391	0.3618
5	0	0	1.9113	2.3776	0.7661	0.9472	0.2075	0	0.5661	0.4465
6	0	0	1.1879	-	2.6694	1.381	-	0	-	0.0293
7	0	0	1.4247	-	0.6031	0.5225	0.1951	0	-	0.6651
8	0	0	0.963	-	1.447	2.5646	-	0	0.4342	0.1701
9	0	0	-	4.9154	0.4497	1.8577	-	0	0.1324	-
10	0	0	0.1374	-	0.1337	1.4297	0.0896	0	0.1773	0.8058
Mean	0	0	1	6.9132	1	1.4841	1	0	1	0.6083
SEM	0	0	0.1812	2.584	0.2434	0.2569	0.6044	0	0.4389	0.1751

## Sheet: Figure 6 (A-H)
Figure 5. mRNA expression of the senescence-associated secretory phenotypes (SASPs); Il6 (A–D), and Cxcl1 (E–H) in the heart, liver, bone, kidney, and hypothalamus of SHR and WT rats at the age of 6, 12, 24 and 36 weeks.
Fig 5A. Il6 mRNA expression (fold change) at the age of 6 weeks
	Il6 mRNA expression (fold change)
	Heart		Liver		Bone		Kidney		Hypothalamus
N	6WT	6SHR	6WT	6SHR	6WT	6SHR	6WT	6SHR	6WT	6SHR
1	1.0125	5.4637	0.1206	-	0.83	-	-	0.4381	0.8081	1.2467
2	0.7601	3.9111	0.0996	0.0595	0.8147	0.7853	0.8447	0.233	1.2007	1.1144
3	0.086	3.0582	0.2543	1.0525	0.5853	0.9228	0.8243	0.1631	1.9344	0.438
4	1.4798	1.0135	0.4909	1.5958	1.0191	1.4386	0.975	0.2533	0.3609	0.362
5	0.9882	0.6911	7.1887	1.006	0.8592	1.0867	0.7464	-	0.5354	0.8035
6	1.0106	2.5954	0.1334	0.0959	1.4212	1.301	1.2275	0.3335	1.4475	-
7	0.4072	1.8728	0.6189	0.6896	-	1.516	1.063	0.4467	1.3804	0.902
8	-	4.0117	-	0.0611	0.8001	1.0328	1.3625	0.5138	0.4428	0.8048
9	1.5212	1.1352	0.0372	0.2396	1.3267	0.8739	-	0.1358	0.8303	0.1894
10	1.7344	1.2981	0.0565	0.7942	1.3437	1.6251	0.9565	-	1.0595	0.2301
Mean	1	2.5051	1	0.6216	1	1.1758	1	0.3147	1	0.6768
SD	0.1782	0.5007	0.7765	0.1814	0.0984	0.1013	0.0743	0.0497	0.1585	0.1287
Fig 5B. Il6 mRNA expression (fold change) at the age of 12weeks
	Il6 mRNA expression (fold change)
	Heart		Liver		Bone		Kidney		Hypothalamus
N	12WT	12SHR	12WT	12SHR	12WT	12SHR	12WT	12SHR	12WT	12SHR
1	-	4.2631	4.2736	0.9965	0.9788	0.5517	1.0266	0.6696	1.1415	1.5556
2	0.651	-	0.0938	1.9115	-	0.6234	0.2782	0.6474	2.3523	1.7543
3	1.6288	1.2643	0.3749	0.4844	0.9998	0.8147	1.3454	0.51	0.7719	-
4	0.8004	2.2799	0.1395	2.4767	0.8208	0.6476	1.6377	0.4361	1.0443	0.8079
5	0.5714	1.5082	0.9309	2.5418	1.0378	0.5911	0.534	0.214	1.4007	6.1709
6	1.0222	4.2669	0.49	0.1026	0.8619	0.4787	0.6574	0.5947	0.6501	0.5057
7	0.7698	1.1916	1.8629	0.306	0.6019	0.7737	0.6813	0.5314	0.6325	-
8	0.5314	4.3114	0.3482	1.1547	0.984	0.4521	1.8056	-	0.3598	-
9	1.3071	6.9614	0.5559	-	1.3357	-	1.8352	0.5192	-	-
10	1.718	3.4651	0.9302	0.7589	1.3791	1.5242	0.1986	0.6459	0.6469	-
Mean	1	3.2791	1	1.1926	1	0.7175	1	0.5298	1	2.1589
SEM	0.1502	0.6363	0.3987	0.3048	0.0806	0.1085	0.1964	0.0472	0.1991	1.029
Fig 5C. Il6 mRNA expression (fold change) at the age of 24 weeks
	Il6 mRNA expression (fold change)
	Heart		Liver		Bone		Kidney		Hypothalamus
N	24WT	24SHR	24WT	24SHR	24WT	24SHR	24WT	24SHR	24WT	24SHR
1	1.6702	1.7117	0.0604	25.7328	0.7636	0.8206	1.1626	1.3372	1.1101	0.8772
2	0.8522	1.5106	2.1732	26.1038	0.8053		0.3944		0.9255	0.6344
3	1.0149	1.0012	0.2308	4.9812	1.5182		0.285	0.8927	0.0378	0.467
4	1.8806	1.0098	0.0843	25.1752	2.2268		0.7312	0.4536	0.6196	0.5484
5	1.1533	2.8214	0.1912	55.3252	1.4056	1.2584	0.2109	0.093	1.1528	0.3997
6	0.1572	0.6624	0.4843	20.7182	0.8934	0.4189	0.0921	0.1278		2.331
7	0.6644	1.6965	3.323	22.116	0.4878	0.5521	0.3036	0.0684	0.6957
8	0.5253	1.9515	0.0904	36.7356	0.2963	1.5984	0.7972	0.3879	0.8667	1.3644
9	0.9567	0.5005	0.8838	64.6637	0.6029	1.2265	1.6514	0.2104	1.1057	1.6261
10	1.1252	0.3773	2.4786			1.245	4.3716	0.0864	2.4862	1.2828
Mean	1	1.3243	1	31.2835	1	1.0171	1	0.4064	1	1.059
SEM	0.1611	0.2398	0.3805	6.129	0.2027	0.1622	0.4047	0.1461	0.2186	0.2154
Fig 5D. Il6 mRNA expression (fold change) at the age of 36 weeks
	Il6 mRNA expression (fold change)
	Heart		Liver		Bone		Kidney		Hypothalamus
N	36WT	36SHR	36WT	36SHR	36WT	36SHR	36WT	36SHR	36WT	36SHR
1	1.3254	3.9245	0.0133	7.97	0.2011	-	1.9159	-	1.068	0.7053
2	1.7087	1.6199	0.0827	24.9779	0.7248	0.9091	1.6188	0.0877	1.4097	0.4611
3	1.2568	0.8376	0.0678	12.7345	0.8492	0.647	1.1281	0.0213	1.5718	0.3972
4	0.5946	0.7179	0.0321	5.6996	0.6505	1.1543	1.1457	0.0079	1.1323	0.1953
5	0.6118	0.4407	0.0501	10.694	0.8165	0.7631	0.9502	0.0182	1.8863	0.3904
6	0.5125	0.8363	0.293	-	1.8593	1.4072	1.1309	0.3697	0.5709	0.9828
7	0.6857	0.6751	6.2816	7.4063	1.0157	1.2372	0.3267	0.254	0.6758	0.6365
8	0.7814	1.1149	1.0535	6.3162	2.1933	2.5037	0.571	0.4282	0.9311	0.8748
9	0.8211	3.1064	2.1034	8.5562	0.7807	3.11	0.7319	0.1897	0.2567	0.5785
10	1.7019	1.493	0.0223	17.2995	0.9089	1.7127	0.4808	0.3306	0.4974	1.0074
Mean	1	1.4766	1	11.2949	1	1.4938	1	0.1897	1	0.6229
SEM	0.1452	0.3638	0.6245	2.093	0.1859	0.2754	0.1584	0.0546	0.1634	0.0859
Fig 5E. Cxcl1 mRNA expression (fold change) at the age of 6 weeks
	Cxcl1 mRNA expression (fold change)
	Heart		Liver		Bone		Kidney		Hypothalamus
N	6WT	6SHR	6WT	6SHR	6WT	6SHR	6WT	6SHR	6WT	6SHR
1	0	0	0.9479	-	0.4982	0.627	-	0.9796	0.6913	0.7664
2	0	0	1.0876	1.8314	1.8124	0.7392	-	-	0.8688	0.6464
3	0	0	1.1164	13.6905	0.4306	1.1872	0.6943	0.0662	0.4298	0.8467
4	0	0	1.6753	4.7012	1.6834	0.6004	1.6628	0.2211	0.9313	0.1714
5	0	0	0.7747	99.0648	1.623	0.7323	0.7103	-	1.6446	0.3892
6	0	0	0.3608	2.8292	0.6579	0.638	0.3025	1.0872	1.4463	-
7	0	0	1.904	4.5626	-	0.89	0.6672	0.3309	1.1284	0.8857
8	0	0	-	0.7652	1.1014	0.4012	2.7707	0.907	1.409	0.8254
9	0	0	0.1137	4.1462	0.2649	0.1246	-	1.252	0.6773	0.7901
10	0	0	1.0197	4.6552	0.9283	0.4028	0.1922	-	0.7731	2.1179
Mean	0	0	1	15.1385	1	0.6343	1	0.692	1	0.8266
SD	0	0	0.1879	10.56	0.1959	0.0919	0.3451	0.1788	0.1246	0.1799
Fig 5F. Cxcl1mRNA expression (fold change) at the age of 12weeks
	Cxcl1 mRNA expression (fold change)
	Heart		Liver		Bone		Kidney		Hypothalamus
N	12WT	12SHR	12WT	12SHR	12WT	12SHR	12WT	12SHR	12WT	12SHR
1	0	0	1.07	46.572	0.6996	0.5498	2.6681	0.2544	0.7253	0.282
2	0	0	0.4461	24.1719	-	0.4062	0.7684	0.2704	2.1813	0.9848
3	0	0	0.4927	2.7123	0.3601	1.3599	0.0942	0.164	0.2794	-
4	0	0	0.5562	12.7464	0.4931	0.1821	-	0.0777	0.8374	0.2107
5	0	0	0.8303	25.3261	0.2286	0.1915	0.4694	-	1.1524	1.0102
6	0	0	0.6992	0.7379	1.4088	0.5369	-	0.6393	0.6218	0.7923
7	0	0	1.8524	1.7382	2.8014	0.3035	-	-	1.4156	-
8	0	0	0.2346	19.4148	0.9545	0.253	-	-	0.5541	-
9	0	0	0.637	-	0.434	1.127	-	0.3171	-	-
10	0	0	3.1815	9.5256	1.62	1.0199	-	0.218	1.2328	-
Mean	0	0	1	15.8828	1	0.593	1	0.2773	1	0.656
SEM	0	0	0.2806	4.952	0.2756	0.1344	0.5729	0.0672	0.1903	0.1718
Fig 5G. Cxcl1 Il6 mRNA expression (fold change) at the age of 24 weeks
	Cxcl1 mRNA expression (fold change)
	Heart		Liver		Bone		Kidney		Hypothalamus
N	24WT	24SHR	24WT	24SHR	24WT	24SHR	24WT	24SHR	24WT	24SHR
1	0	0	0.0307	3.0156	0.0753	0.0575	0.4877	0.0387	0.3569	0.3203
2	0	0	0.2775	15.8414	0.6452	-	0.0528	-	0.0555	0.088
3	0	0	0.1164	6.0087	-	-	0.2553	0.0163	0.8122	0.0432
4	0	0	0.113	4.3476	0.1512	-	0.58	-	0.3395	0.0396
5	0	0	0.0241	-	-	0.0633	0.2089	0.0178	0.9858	0.092
6	0	0	0.0305	2.508	0.1524	2.3429	0.0825	-	-	0.073
7	0	0	0.3364	1.5986	0.6433	1.1612	0.0796	-	0.0664	-
8	0	0	0.0695	2.5459	1.6001	1.3403	0.0606	0.0331	0.0823	0.2067
9	0	0	0.2068	4.0849	3.7325	0.2678	-	-	0.0605	0.1318
10	0	0	8.7952	-	-	0.4138	7.1925	-	6.2409	0.0715
Mean	0	0	1	4.9938	1	0.8067	1	0.0265	1	0.1184
SD	0	0	0.8668	1.623	0.497	0.321	0.7767	0.0056	0.665	0.0304
Fig 5H. Cxcl1 Il6 mRNA expression (fold change) at the age of 36 weeks
	Cxcl1 mRNA expression (fold change)
	Heart		Liver		Bone		Kidney		Hypothalamus
N	36WT	36SHR	36WT	36SHR	36WT	36SHR	36WT	36SHR	36WT	36SHR
1	0	0	0.8554	12.6821	1.0112	-	0.3957	-	0.8705	0.5775
2	0	0	4.3602	16.7871	1.3016	2.237	3.5504	-	0.8489	0.4293
3	0	0	1.6821	9.9017	0.4459	2.5902	0.1348	0.6179	0.5488	0.489
4	0	0	0.26	11.7389	1.0235	1.6925	-	-	0.7953	0.4296
5	0	0	0.6637	2.1312	2.548	1.3447	-	-	2.3945	0.2898
6	0	0	0.3859	-	1.7294	1.7234	-	0.216	1.8124	0.3203
7	0	0	0.4679	5.3169	0.4237	0.6176	1.0635	-	0.9065	0.5077
8	0	0	0.0657	31.5581	0.9874	2.1989	0.4207	0.262	0.7297	0.5091
9	0	0	-	7.1095	0.4781	1.2776	-	0.1959	0.7209	0.9468
10	0	0	0.2591	89.4374	0.0512	1.654	0.4349	0.5591	0.3725	0.9418
Mean	0	0	1	20.7403	1	1.704	1	0.3702	1	0.5441
SEM	0	0	0.4491	9.041	0.2317	0.1975	0.5253	0.0903	0.1956	0.0721

## Sheet: Figure 7 (C-D)
Figure 6. Simultaneous small- and wide-angle X-ray scattering (synchrotron SAXS/WAXS) analyses of collagen fibril arrangement and crystallite dimensions in the cortical bone specimens from 24-week-old WT and SHR. (A) 1st–6th peaks from SAXS analysis. (B) 2D-SAXS analysis. (C) WAXS analysis of crystal width, and (D) WAXS analysis of crystal length.
The measurement of the crystal width and length of cortical bone are presented in angstrom (Å)
Fig 6C. crystal width
	Crystal width (Å)
N	WT	SHR
1	48.1	50.4
2	44.2	41.1
3	48.3	35.9
Mean	46.87	42.47
SEM	1.34	4.24
Fig 6D. Crystal length
	Crystal length (Å)
N	WT	SHR
1	152.2	141.1
2	146.1	145.3
3	144.4	141.1
Mean	147.57	142.5
SEM	2.37	1.4

## Sheet: Supplementary Fig.3
Figure S3. Timp1 mRNA expression (fold change)
N	Timp1 mRNA expression (fold change)
	Vehicle	Propanolol
1	0.134783	0.0687196
2	0.0490677	0.0163033
3	0.2747	1.24411
4	1.54215	0.205941
5	0.83632	0.0569209
6	1.64578	0.0944975
7	1.04184	0.111135
8	2.47536	0.0577015
Mean	1	0.231916
SEM	0.3016	0.1459
